# Supplementary material for: Application of a novel diol-based porous organic polymer to the determination of trace-level tetracyclines in water
Source: Royal Society of Chemistry journal article supplement (doi:10.1039/c8ay02790k), 2019-01-01
Supplement: c8ay02790k1.pdf [file c8ay02790k1.pdf]

## Supplementary Information

### **Application of a novel diol-based porous organic polymers on the determination of trace level tetracyclines in water**

Changzheng Cui<sup>1</sup>, Zan Cao<sup>1</sup>, Shenping Zhang<sup>2</sup>, Yaru Hu<sup>1</sup>, Lei Jiang<sup>3</sup>, Shijie Yao<sup>1</sup>, Hui Ye<sup>3</sup>, Yanbo Zhou<sup>1</sup>, Jun Hu<sup>2\*</sup>, Kuangfei Lin<sup>1</sup>, Tian-Yang Zhang<sup>1\*</sup>

- 1. State Environmental Protection Key Laboratory of Environmental Risk Assessment and Control on Chemical Process, School of Resources and Environmental Engineering, East China University of Science and Technology, Shanghai, China, 200237.*
- 2. School of Chemistry and Molecular Engineering, East China University of Science and Technology, Shanghai, China, 200237.*
- 3. National Engineering Research Center of Urban Water Resources, Shanghai, China, 200082.*

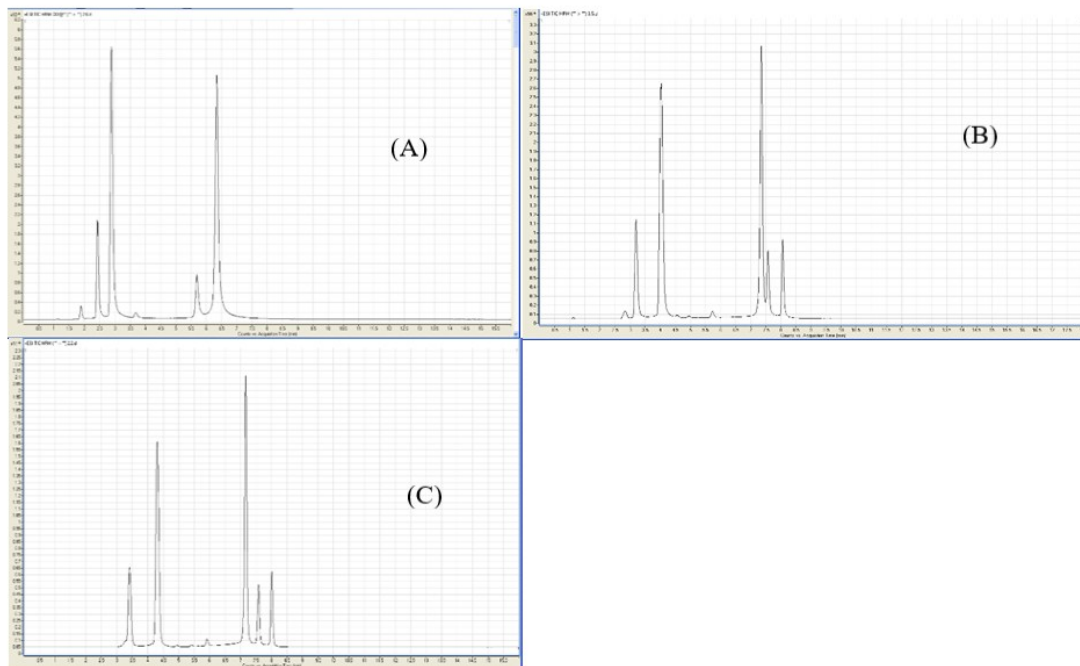

**Fig. S1** A total ion chromatogram reflecting the effect of organic mobile phase on chromatographic separation (A) acetonitrile-water; (B) methanol-water; (C) formic acid: acetonitrile (0.1:99.9, v/v)- formic acid: water (0.1:99.9,v/v).Other parameters: flow rate:  $0.4 \text{ mL} \cdot \text{min}^{-1}$ ; injection volume:  $10 \mu\text{L}$ .

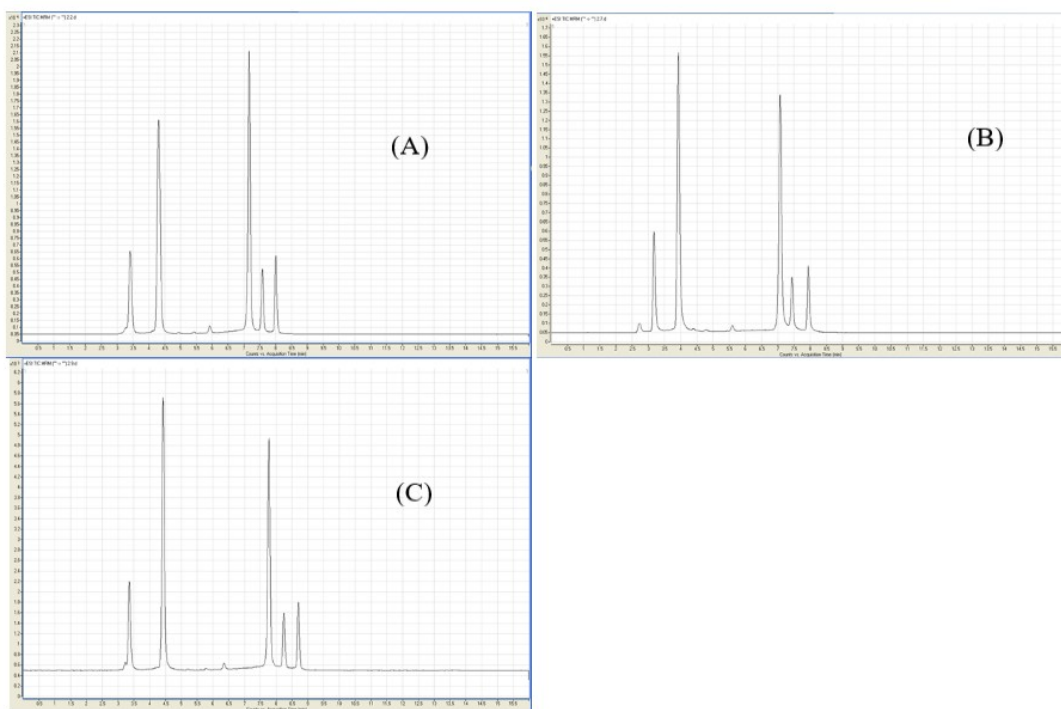

**Fig. S2** A total ion chromatogram reflecting the effect of injection volume chromatographic separation (A) 2  $\mu\text{L}$ ; (B) 5  $\mu\text{L}$ ; (C) 10  $\mu\text{L}$ . Other parameters: mobile phase, formic acid: acetonitrile (0.1:99.9, v/v) - formic acid :water (0.1:99.9, v/v); flow rate: 0.2  $\text{mL} \cdot \text{min}^{-1}$

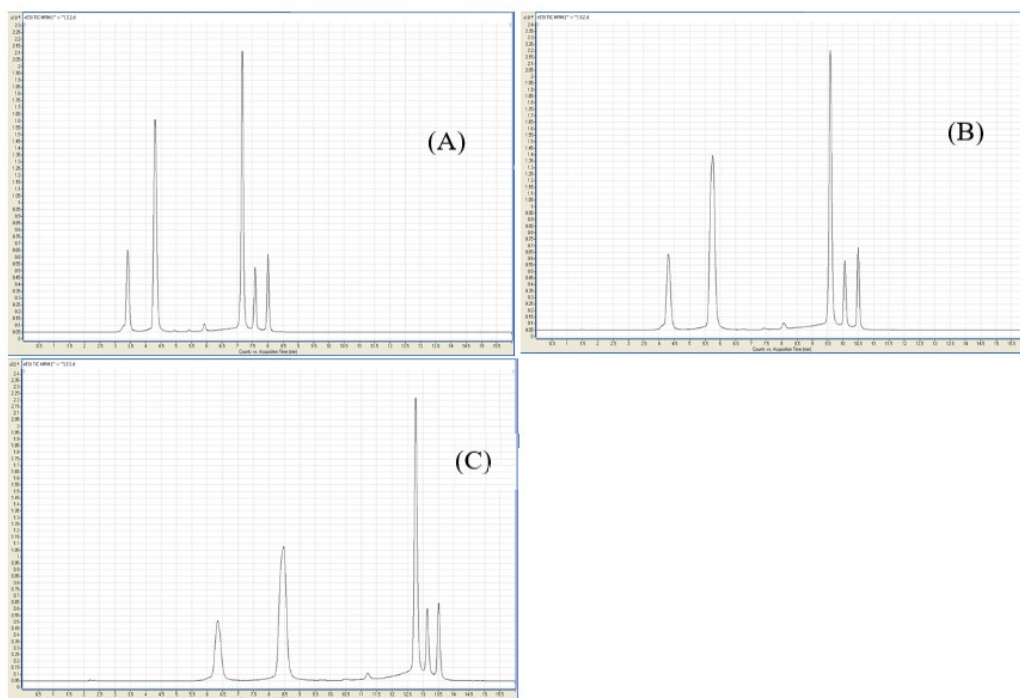

**Fig. S3** A total ion chromatogram reflecting the effect of flow rate on chromatographic separation (a) 0.4 mL·min<sup>-1</sup>; (b) 0.3 mL·min<sup>-1</sup>; (c) 0.2 mL·min<sup>-1</sup>. Other parameters: mobile phase, formic acid: acetonitrile (0.1:99.9, v/v)- formic acid: water (0.1:99.9, v/v); injection volume: 10 μL.

**Table S1** Development of TCs and their properties

| Classification    | antibiotics       | time to market | Characterizations                                                                                                                                                                                               |
|-------------------|-------------------|----------------|-----------------------------------------------------------------------------------------------------------------------------------------------------------------------------------------------------------------|
| First generation  | chlortetracycline | 1948           | Natural broad-spectrum antibiotics containing phenanthranes, widely used in infection caused by gram-positive and negative bacteria, intracellular mycoplasma, chlamydia and rickettsidia                       |
|                   | oxytetracycline   | 1948           |                                                                                                                                                                                                                 |
|                   | tetracycline      | 1953           |                                                                                                                                                                                                                 |
| Second generation | demeclocycline    | 1965           | modify the inactivated essential groups in natural tetracyclines to change their antimicrobial activity, chemical stability. These antibiotics are more lipophilic and easier to absorb                         |
|                   | metacycline       | 1965           |                                                                                                                                                                                                                 |
|                   | doxycycline       | 1967           |                                                                                                                                                                                                                 |
| Third generation  | minocycline       | 1972           | The d-ring of natural tetracyclines was replaced by a variety of groups, such as glycy, dimethylamine and fluorine. This kind of structure is very difficult to construct by the previous semi-synthetic method |
|                   | tigecycline       | 2005           |                                                                                                                                                                                                                 |

**Table S2** Target TCs and their properties

| Compounds | pK <sub>a</sub> | Molecular form                                                  | MW (g/mol) | CAS number | Structure                                                                             |
|-----------|-----------------|-----------------------------------------------------------------|------------|------------|---------------------------------------------------------------------------------------|
| TC        | 3.32/7.78/9.58  | C <sub>22</sub> H <sub>24</sub> N <sub>2</sub> O <sub>8</sub>   | 480.90     | 64-75-5    | 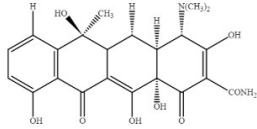   |
| CTC       | 3.33/7.55/9.33  | C <sub>22</sub> H <sub>23</sub> ClN <sub>2</sub> O <sub>8</sub> | 478.88     | 57-62-5    |    |
| OTC       | 3.22/7.46/8.94  | C <sub>22</sub> H <sub>24</sub> N <sub>2</sub> O <sub>9</sub>   | 460.44     | 2058-46-0  |    |
| MTC       | 2.88/7.44       | C <sub>22</sub> H <sub>22</sub> N <sub>2</sub> O <sub>8</sub>   | 442.42     | 914-00-1   |   |
| DOC       | 3.52/7.75/9.57  | C <sub>22</sub> H <sub>24</sub> N <sub>2</sub> O <sub>8</sub>   | 444.43     | 564-25-0   |  |
